1 ***Cutibacterium acnes* clonal complexes display various growth rates in blood-culture**  
2 **bottles used for diagnosing orthopedic device-related infections**

3 Running title: Growth rates of *C. acnes* CCs in blood-culture bottles

4 Authors: Faten El Sayed<sup>1, 2</sup>, Petra Camernik<sup>3</sup>, Anne-Laure Roux<sup>1, 2</sup>, Lea Papst<sup>4</sup>, Thomas  
5 Bauer<sup>5</sup>, Lionelle Nkam <sup>6</sup>, Valérie Sivadon-Tardy<sup>1</sup>, Latifa Noussair<sup>7</sup>, Jean-Louis Herrmann<sup>2, 7</sup>,  
6 Jean-Louis Gaillard<sup>1, 2</sup>, Samo Jeverica<sup>3</sup>, and Martin Rottman<sup>2, 7</sup>.

7 <sup>1</sup>APHP, GHU Paris Saclay, Hôpital Ambroise Paré, Microbiology Department, Boulogne-  
8 Billancourt, France. <sup>2</sup>Université Paris-Saclay, UVSQ, Inserm, Infection et Inflammation,  
9 Montigny-Le-Bretonneux, France. <sup>3</sup>Institute of Microbiology and Immunology, Faculty of  
10 Medicine, University of Ljubljana, Ljubljana, Slovenia. <sup>4</sup>Department of Infectious Diseases,  
11 University Medical Centre Ljubljana, Ljubljana, Slovenia. <sup>5</sup>APHP, GHU Paris Saclay, Hôpital  
12 Ambroise Paré, Orthopedic Surgery Department, Boulogne-Billancourt, France. <sup>6</sup>Clinical  
13 Research Unit, APHP Paris Saclay Ouest, Ambroise Paré Hospital, Boulogne-Billancourt,  
14 France. <sup>7</sup>APHP, GHU Paris Saclay, Hôpital Raymond Poincaré, Microbiology Department,  
15 Garches, France.

16 Corresponding author:

17 Faten El Sayed

18 @: [faten.elsayed@aphp.fr](mailto:faten.elsayed@aphp.fr)

19

20

21 **ABSTRACT**

22 Blood-culture bottles (BCBs) are widely used to improve the diagnosis of orthopedic device-  
23 related infections. Data is scarce on the growth of *Cutibacterium acnes* and its genotypes in  
24 BCBs under real-life clinical conditions.

25 We studied 39 cases of revision arthroplasty for which at least one intraoperative sample  
26 yielded a pure *C. acnes* culture from anaerobic BCBs (BD Bactec Lytic/10 Anaerobic/F [Lytic  
27 Ana]) and/or solid media. Genotyping of *C. acnes* isolates from the 39 cases allowed: i) the  
28 identification of 49 non-redundant isolates belonging to four clonal complexes (CCs): CC18,  
29 CC28, CC36, and CC53 and ii) the determination of infectant and contaminant strains. Under  
30 real-life clinical conditions, Lytic Ana alone was more often positive for contaminants than  
31 infectant strains (18/36 [50%] *versus* 2/13 [15.4%];  $p = 0.047$ ). The time to detection (TTD)  
32 values in Lytic Ana were shorter for CC53 than other CCs (mean [SD] TTD: 77 [15] *versus* 165  
33 [71] hours;  $p = 0.02$ ). CC53 was confirmed to grow faster than other CCs by studying an  
34 enlarged panel of 70 genotyped *C. acnes* strains inoculated *in vitro* into Lytic Ana vials (mean  
35 [SD] TTD: 73 [13] *versus* 122 [50] hours;  $p < 0.001$ ).

36 The use of Lytic Ana BCBs in orthopedics increases the recovery rate of *C. acnes* but leads to  
37 the isolation of proportionally more contaminants than true infectant strains. TTD values are  
38 much shorter for CC53 strains, irrespective of their being infectant or contaminant. TTD does  
39 not solely reflect the bacterial load of samples but also clonal complex-related traits.

40

## 41 INTRODUCTION

42 *Cutibacterium acnes* is an anaerobic aero-tolerant microorganism that is involved in orthopedic  
43 device-related infections (ODRIs) and is a frequent cause of shoulder prosthetic joint infection.  
44 The diagnosis of *C. acnes* ODRI is, however, challenging in clinical practice. *C. acnes* ODRIs  
45 are often associated with few clinical manifestations and normal or subnormal levels of  
46 inflammatory markers. It is a common inhabitant of the human skin and sebaceous glands and  
47 may be a contaminant. Finally, it is a fastidious organism that is difficult to isolate from clinical  
48 samples.

49 Recent advances have been made in the microbiological diagnosis of ODRIs by inoculating  
50 relevant samples (e.g. synovial fluid or homogenates of periprosthetic tissue) into aerobic and  
51 anaerobic blood culture bottles (BCBs), which are then incubated and monitored in an  
52 automated device (1–5). However, data is scarce on the relevance of this approach for the  
53 diagnosis of ODRIs caused by *C. acnes*. Minassian et al. found that 96% of anaerobic cultures,  
54 including those of *C. acnes*, were detected within five days, and 99% within 10 days using the  
55 BD Bactec system. However, incubating anaerobic BCBs beyond seven days was shown to  
56 yield only contaminants, all *C. acnes* (2). Similarly, we previously showed that “infectant” *C.*  
57 *acnes* were all detected within seven days of incubation when anaerobic BCBs were inoculated  
58 with bead-milled tissue samples (unpublished data).

59 The previous studies, including ours, did not focus specifically on *C. acnes* and included results  
60 from only a small number of *C. acnes* strains. Recently, Rentenaar *et al.* studied the detection  
61 of a panel of 26 clinical *C. acnes* isolates in various BCBs. However, the experiments were  
62 performed by *in vitro* inoculation of BCBs and were mainly aimed at comparing the  
63 performance of BCB vials available in the Becton Dickinson system (6). Moreover, there was  
64 no information about the genotypes of the isolates.

65 “Orthopedic” strains inoculated *in vitro* into anaerobic BCBs were recently found to be  
66 associated with a broad range of TTD values (7). This prompted us to study whether such  
67 variability may be related to the genotype and to evaluate its clinical impact.

## 68 PATIENTS AND METHODS

### 69 Background information

70 The surgery department of the Ambroise Paré hospital is a French reference center for the  
71 management of bone and joint infections. All patients undergoing surgery for ODRIs or  
72 suspicion of an ODRI have at least three intraoperative samples taken for microbiological  
73 culture using both BCBs and solid media.

### 74 Bacteriological methods

75 Intraoperative tissue samples were bead-milled in sterile water (8) and the homogenates  
76 inoculated: i) onto solid media and incubated for five days (Columbia sheep blood agar under  
77 aerobic and anaerobic conditions and chocolate agar under 5% CO<sub>2</sub>), ii) into aerobic BCBs  
78 (BD Bactec Peds+, Becton Dickinson Diagnostics, Sparks, MD) and incubated for seven days,  
79 and iii) into anaerobic BCBs (BD Bactec Lytic/10 Anaerobic/F; “Lytic Ana”) and incubated for  
80 14 days. Aerobic and anaerobic BCBs were monitored in the Bactec FX instrument (Becton  
81 Dickinson Diagnostics) and subcultured only if the instrument gave a positive result. Bacterial  
82 isolates were identified by mass spectrometry using a Microflex LT instrument and the current  
83 CE-marked IVD Biotyper software (Bruker Daltonique, Wissenbourg, France). Subsequent  
84 cryopreservation was performed on colonies randomly selected from a pure subculture plate.

### 85 *C. acnes* genotyping

86 Cryopreserved *C. acnes* isolates were genotyped using a previously described multi-locus  
87 sequence typing (MLST) scheme (9). Purified PCR products were sequenced using the  
88 BigDye® Terminator v1.1 kit on an Applied Biosystems 3500xl Dx sequencer. The sequence  
89 type (ST) was determined using a publicly available MLST database (<http://pacnes.mlst.net>).  
90 The clonal complex (CC) was determined by eBURST analysis (eBURST version 2 -  
91 <http://eburst.mlst.net>).

92

93 **Definitions**

94 A *C. acnes* strain was considered to be infectant if it was cultured from at least two distinct  
95 samples (same ST and same antibiotic susceptibility pattern) belonging to the same case or a  
96 contaminant if it was cultured from only one sample. A *C. acnes* case was considered to be an  
97 infection if at least one infectant *C. acnes* strain was recovered. Otherwise, it was considered  
98 to be a contamination.

99 If two or more samples were positive for the same ST in a given patient, only one sample,  
100 selected at random, was considered for further analyses, under both clinical and experimental  
101 conditions.

102 **Study under real-life clinical conditions**

103 We included 39 cases for which: i) at least one intraoperative sample yielded a pure *C. acnes*  
104 culture from Lytic Ana and/or anaerobic solid media, ii) *C. acnes* isolates were genotyped, and  
105 iii) no other microbial pathogen was recovered. Recovery rates on each culture media and the  
106 time to detection (TTD) value of *C. acnes* isolates in Lytic Ana were retrieved from the  
107 laboratory information software.

108 **Study under experimental (*in vitro*) conditions**

109 In addition to the isolates recovered from the 39 cases, we added 20 additional cases selected  
110 according to the same clinical criteria but for which the growth data from the initial culture could  
111 not be retrieved from the laboratory information software to enlarge our collection.

112 A 0.5-McFarland suspension of *C. acnes*, was prepared from cryopreserved isolates  
113 subcultured for 72 h on Columbia 5% sheep blood agar. Serial dilutions in sterile saline were  
114 performed to obtain  $\sim 10^2$  colony-forming units (CFUs)/mL. Two “Lytic Ana” vials without blood  
115 or additives were inoculated with 1 mL ( $\sim 10^2$  CFUs). The inoculum density and viability were  
116 controlled by enumeration of CFUs on Columbia 5% sheep blood agar under anaerobic  
117 conditions. Vials were monitored in a Bactec FX for 14 days or until positivity. Positive vials  
118 were subcultured on aerobic and anaerobic Columbia sheep blood agar to verify culture purity.

## 119 **Data and Statistical analyses**

120 Univariate analysis was performed using Fisher's exact test for categorical variables and the  
121 Wilcoxon-Mann Whitney test for continuous variables. A p-value < 0.05 was considered  
122 significant for all statistical analyses.

123

## 124 **RESULTS**

125 *See flowchart in supplementary file for a summary of cases and strains included in clinical and*  
126 *experimental conditions.*

### 127 **Cases and strains included in the “clinical conditions” study**

128 The patients for the 39 cases studied were mostly male (25/39, 64.1%). The cases included  
129 13 of *C. acnes* infection and 26 of *C. acnes* contamination; three cases harbored both infectant  
130 and contaminant *C. acnes* strains and were classified as “infections”. The patients for cases  
131 of infection were younger than those for cases of contamination, were less likely to have had  
132 surgery for revision arthroplasty, and more likely to have had spinal surgery (Table 1).

133 In total, 49 non-redundant *C. acnes* isolates (“*C. acnes* strains”) were recovered from the 39  
134 cases (one ST, 31 cases; 2 STs, 6 cases; 3 STs, 2 cases) and included 13 infectant and 36  
135 contaminant strains. The 49 strains were distributed among four CCs, with the most frequent  
136 being CC36 (38.8%), followed by CC18 and CC53 (22.4% each), and CC28 (16.3%); CC18  
137 (38.5%) was the most frequent CC among infectant strains and CC36 (44.4%) among  
138 contaminants (Table 2). The overall distribution of CCs showed, however, no significant  
139 difference between infectant strains and contaminants ( $p = 0.36$ , NS).

### 140 **Recovery of strains and clonal complexes from Lytic Ana versus solid media under** 141 **clinical conditions**

142 No *C. acnes* was ever recovered from PedsPlus vials. The included strains were only slightly  
143 more often recovered from Lytic Ana than solid media (63.3% [31/49] versus 59.2% [29/49]).  
144 Overall, strains of *C. acnes* were more often recovered from Lytic Ana alone (40.8%) or solid

145 media alone (36.7%) than from both (22.5%) (Table 3). The recovery rates differed, however,  
146 among infectant strains and contaminants: Lytic Ana and solid media together were more often  
147 positive for infectant strains (53.8% *versus* 11.1% with contaminants,  $p = 0.004$ ), whereas Lytic  
148 Ana was more often positive alone for contaminants (50% *versus* 15.4% with contaminants,  $p$   
149 = 0.047).

150 The recovery rates of CC18, CC28, C36, and CC53 were 81.8%, 62.5%, 52.6%, and 63.6%,  
151 respectively, for Lytic Ana, and 63.6%, 50%, 57.9%, and 63.6%, respectively, for solid media.  
152 There was no significant difference in the distribution of CCs among strains recovered from  
153 the various media (Table 3).

#### 154 **Lytic Ana TTD values of infectant strains and contaminants under clinical and** 155 **experimental conditions**

156 TTD values were available for 24 of 31 *C. acnes* strains recovered from BCBs. The overall  
157 mean (SD) TTD values of *C. acnes* strains ( $n = 24$ ) in Lytic Ana was 150 (73.2) hours under  
158 real-life clinical conditions. The mean values were significantly lower for infectant strains ( $n =$   
159 6) than contaminants ( $n = 18$ ) (98.3 [53.4] *versus* 167.8 [71.7] hours,  $p = 0.02$ ) and, at seven  
160 days post-inoculation, Lytic Ana was more often positive for infectant strains than  
161 contaminants, although the difference did not reach significance (83.3% [5/6] *versus* 38.9%  
162 [7/18],  $p = 0.15$ ) (Fig. 1A). In contrast, the mean TTD values measured under controlled  
163 experimental conditions, corresponding to 70 isolates (47/49 + 23), were very similar between  
164 infectant strains ( $n = 23$ ) and contaminants ( $n = 47$ ) (111 [37.2] *versus* 115 [54.9] hours,  $p =$   
165 0.67) and the proportion of strains positive at seven days post-inoculation was approximately  
166 80% for both groups (Fig. 1B).

#### 167 **Lytic Ana TTD values of the four main clonal complexes under clinical and experimental** 168 **conditions**

169 The mean TTD values of the various *C. acnes* CCs measured under clinical conditions ranged  
170 from 77.5 (CC53) to 220 hours (CC28) (Table 4). The CC53 strains had significantly lower  
171 mean TTD values than all other strains (77.5 [15] *versus* 165 [71] hours,  $p = 0.02$ ) (Table 4)

172 and were all recovered by seven days post-inoculation (Table 4 and Fig. 1C). The CC36,  
173 CC18, and CC28 strains had recovery rates of 50%, 43%, and 0%, respectively, at seven days  
174 post-inoculation (Table 4 and Fig. 1C). However, there were only three CC28 strains and all  
175 were contaminants.

176 The CC53 strains were confirmed to grow faster in Lytic Ana than strains from other CCs under  
177 controlled experimental conditions (mean [SD] TTD values: 73 [12.8] *versus* 122 [50] hours,  $p$   
178  $< 0.001$ ) (Table 4). By seven days post-inoculation, 100% of the CC53 strains had been  
179 recovered *versus* 93% of the CC36 strains and approximately 70% of the CC18 and CC28  
180 strains (Table 4 and Fig. 1D).

181



## 182 DISCUSSION

183 This is the first study to examine the relationship between *C. acnes* genotype and the time to  
184 detection in blood culture vials seeded with intraoperative samples from orthopedic surgery.  
185 The blood culture vial used was the Lytic Ana vial, proven for its effectiveness in this setting  
186 (6, 7). Nearly 40 cases of infection and contamination with *C. acnes* from our center were  
187 included, making it one of the largest clinical series published to date (10–12). Moreover, the  
188 MLST typing of all isolates allowed the inclusion of a single ST type per case, limiting  
189 redundancy and allowing the rigorous classification of infectant and contaminant cases (13).  
190 Finally, this study in a real-life clinical setting was complemented with an *in vitro* study to assay  
191 a significant number of isolates from each CC and standardize the inoculum to avoid bacterial  
192 load bias.

193 Our data show that all CCs of *C. acnes* do not grow at the same rate in the Lytic Ana vial.  
194 Indeed, CC53 isolates were detected twice as fast as the other CCs, both in real-life clinical  
195 settings and *in vitro* in laboratory settings. One hundred percent of CC53 isolates were  
196 detected from day 5 after incubation under both clinical and experimental conditions *versus*  
197 50% or less for the other CCs. Moreover, our *in vitro* data suggest that CC36 isolates have an  
198 intermediate growth rate between the faster CC53 and slower CC18 and CC28, but these  
199 results must be confirmed on a larger dataset. Finally, the abnormally prolonged time to  
200 detection of CC28 isolates in the clinical setting was not reproducible *in vitro*, which may be  
201 due to the contaminant status of the strains analyzed (see below) or epigenetic imprinting.

202 We cannot offer a clear explanation for the behavior of CC53 in Lytic Ana vials relative to the  
203 other CCs. Nonetheless, CC53 belongs to phylotype II, whereas CC18, CC28, and CC36  
204 belong to phylotype I (9). CC53 isolates may therefore carry metabolic or physiological  
205 characteristics that are distinct from the other CC's that better suit them to growth in Lytic Ana  
206 medium, as this trait is not observed in BacT/SN bioMérieux medium (data not shown). The  
207 most significant formulation specificity of the Lytic Ana medium is the presence of saponin, a  
208 natural detergent composed of an amphipathic glycoside with a lipophilic polycyclic derivative.

209 Saponin may be a direct source of fatty acids that CC53 could specifically use, by analogy with  
210 the use of Tween by some mycobacteria or corynebacteria (14–16).

211 Our study provides several other important observations. First, our data confirm that infective  
212 strains of *C. acnes* are detected significantly sooner than contaminants. This difference was  
213 entirely abolished when the vials were seeded with a standardized *in vitro*-grown inoculum.  
214 The slower growth of contaminant isolates in clinical settings may therefore be associated with  
215 a lower bacterial burden. An alternative explanation is the presence of an epigenetic imprint.  
216 Our results also show that a growth time between five and eight days discriminates between  
217 infectant and contaminant isolates. However, although 60% of contaminant isolates failed to  
218 grow within this timeframe, as much as 20% of infective isolates showed delayed growth  
219 beyond eight days. This result confirms those of previous studies advocating the extended  
220 culture of bone and joint samples beyond eight days when using broth enrichment (e.g.,  
221 Schaedler broth, brain heart Infusion broth, or thioglycolate broth) (10, 11, 17).

222 Another important observation is that blood culture vial enrichment is not sufficient for the  
223 optimal detection of *C. acnes* in bone and joint infection and that combining it with anaerobic  
224 solid media is required. Indeed, as many as 35% of isolates only grew on solid media, whereas  
225 40% of isolates only grew in Ana Lytic medium. Moreover, the recovery rate of contaminants  
226 on blood culture media was 50% vs 15.4% for infectant strains ( $p = 0.047$ ), whereas anaerobic  
227 solid medium did not significantly favor contaminants (recovery rates of 38.9% *versus* 30.8%  
228 for infectant strains). We show that a sample that is simultaneously positive on solid and blood  
229 culture media is predictive of infectiveness, with a 53% combined detection rate for infective  
230 isolates vs 11.1% for contaminants ( $p = 0.004$ ). Similar results have been reported with  
231 thioglycolate, brain heart infusion, and Schaedler broth instead of blood culture vials (10, 11,  
232 17).

233 Our study had several limitations. In spite of a large number of included isolates, the number  
234 of isolates within each CC was limited, which could fail to unveil subtle differences between  
235 their characteristics. As mentioned above, CC36 isolates can display an intermediate growth

236 rate in Lytic Ana relative to isolates belonging to CC53 or CCs 18 and 28. Moreover, our data  
237 suggest that CC18 isolates grow poorly on agar media, with a recovery rate of 18.2% vs 36.4%  
238 to 47.4% for the other CCs. We have not tested all STs within each CC and cannot exclude  
239 that certain STs would behave differently within a CC. However, this seems unlikely for CC53,  
240 which represent a specific phylum within the *C. acnes* population and for which we could  
241 evaluate nine different STs.

242 Our data address solely the Lytic Ana vial and other studies are necessary to determine  
243 whether they can be extrapolated to other blood culture media routinely used for the  
244 enrichment of bone and joint samples. We have previously reported evidence that each blood  
245 culture medium formulation has specific growth characteristics for *C. acnes* (7). The prolonged  
246 incubation of liquid media for the enhanced recovery of *C. acnes* has been widely  
247 recommended, regardless of its diagnostic value. However, we did not extend the incubation  
248 of the CO<sub>2</sub>-chocolate agar or blood agar anaerobic plates. We do not believe that this  
249 negatively affects the detection of pathogens in the context of bead-milled ODRI samples on  
250 the basis of two observations: i) we do not routinely observe pinpoint colonies after five days  
251 of incubation that would prompt us to perform extended incubations and ii) we did not observe  
252 any benefit from incubation past this timepoint when we explored the benefit of prolonged broth  
253 incubation or poor sensitivity of agar plate culture that would lead us to question this process.

254 These results were obtained at a single center and must be confirmed with studies including a  
255 larger number of isolates from different regions of the world and multiple centers.

256 In conclusion, this study is the first to show the impact of the genetic background of *C. acnes*  
257 on its growth rate in blood-culture media and further justifies the relevance of molecular typing  
258 of *C. acnes*.

259

260 **REFERENCES**

- 261 1. Hughes HC, Newnham R, Athanasou N, Atkins BL, Bejon P, Bowler ICJW. 2011.  
262 Microbiological diagnosis of prosthetic joint infections: A prospective evaluation of four  
263 bacterial culture media in the routine laboratory. *Clin Microbiol Infect.*
- 264 2. Minassian AM, Newnham R, Kalimeris E, Bejon P, Atkins BL, Bowler ICJW. 2014. Use  
265 of an automated blood culture system (BD BACTEC™) for diagnosis of prosthetic joint  
266 infections: Easy and fast. *BMC Infect Dis.*
- 267 3. Peel TN, Dylla BL, Hughes JG, Lynch DT, Greenwood-Quaintance KE, Cheng AC,  
268 Mandrekar JN, Patel R. 2016. Improved diagnosis of prosthetic joint infection by  
269 culturing periprosthetic tissue specimens in blood culture bottles. *MBio.*
- 270 4. Portillo ME, Salvadó M, Trampuz A, Siverio A, Alier A, Sorli L, Martínez S, Pérez-Prieto  
271 D, Horcajada JP, Puig-Verdie L. 2015. Improved diagnosis of orthopedic implant-  
272 associated infection by inoculation of sonication fluid into blood culture bottles. *J Clin*  
273 *Microbiol.*
- 274 5. Shen H, Tang J, Wang Q, Jiang Y, Zhang X. 2015. Sonication of explanted prosthesis  
275 combined with incubation in BD Bactec bottles for pathogen-based diagnosis of  
276 prosthetic joint infection. *J Clin Microbiol.*
- 277 6. Rentenaar RJ, Kusen SM, Riemens-Van Zetten GMA, Van Mourika MSM. 2018.  
278 Detection of clinical cutibacterium acnes isolates in different becton dickinson blood  
279 culture vials. *J Clin Microbiol.*
- 280 7. Jeverica S, El Sayed F, Čamernik P, Kocjančič B, Sluga B, Rottman M, Papst L. 2020.  
281 Growth detection of Cutibacterium acnes from orthopaedic implant-associated  
282 infections in anaerobic bottles from BACTEC and BacT/ALERT blood culture systems  
283 and comparison with conventional culture media. *Anaerobe.*
- 284 8. Roux AL, Sivadon-Tardy V, Bauer T, Lortat-Jacob A, Herrmann JL, Gaillard JL, Rottman  
285 M. 2011. Diagnosis of prosthetic joint infection by beadmill processing of a periprosthetic

- 286 specimen. Clin Microbiol Infect.
- 287 9. Lomholt HB, Kilian M. 2010. Population genetic analysis of *Propionibacterium acnes*  
288 identifies a subpopulation and epidemic clones associated with acne. PLoS One 5.
- 289 10. Butler-Wu SM, Burns EM, Pottinger PS, Magaret AS, Rakeman JL, Matsen FA,  
290 Cookson BT. 2011. Optimization of periprosthetic culture for diagnosis of  
291 *Propionibacterium acnes* prosthetic joint infection. J Clin Microbiol.
- 292 11. Bossard DA, Ledergerber B, Zingg PO, Gerber C, Zinkernagel AS, Zbinden R,  
293 Achermann Y. 2016. Optimal length of cultivation time for isolation of *Propionibacterium*  
294 *acnes* in suspected bone and joint infections is more than 7 days. J Clin Microbiol.
- 295 12. Frangiamore SJ, Saleh A, Grosso MJ, Alolabi B, Bauer TW, Iannotti JP, Ricchetti ET.  
296 2015. Early versus late culture growth of *Propionibacterium acnes* in revision shoulder  
297 arthroplasty. J Bone Jt Surg - Am Vol.
- 298 13. El Sayed F, Roux AL, Sapriel G, Salomon E, Bauer T, Gaillard JL, Rottman M. 2019.  
299 Molecular Typing of Multiple Isolates Is Essential to Diagnose *Cutibacterium acnes*  
300 Orthopedic Device-related Infection. Clin Infect Dis.
- 301 14. Chevalier J, Pommier MT, Cremieux A, Michel G. 1988. Influence of Tween 80 on the  
302 mycolic acid composition of three cutaneous corynebacteria. J Gen Microbiol.
- 303 15. Cox FR, Slack CE, Cox ME, Pruden EL, Martin JR. 1978. Rapid tween 80 hydrolysis  
304 test for mycobacteria. J Clin Microbiol.
- 305 16. Pietersen RD, du Preez I, Loots DT, van Reenen M, Beukes D, Leisching G, Baker B.  
306 2020. Tween 80 induces a carbon flux rerouting in *Mycobacterium tuberculosis*. J  
307 Microbiol Methods.
- 308 17. Schäfer P, Fink B, Sandow D, Margull A, Berger I, Frommelt L. 2008. Prolonged  
309 Bacterial Culture to Identify Late Periprosthetic Joint Infection: A Promising Strategy.  
310 Clin Infect Dis.

311 **FIGURE AND TABLES LEGEND**

312 **Figure 1. Time to detection of *C. acnes* strains with Lytic Ana under clinical (A, C) and**  
313 **experimental (*in vitro*) conditions (B, D).** The cumulative percentage of positive strains for  
314 each day for 14 days is shown. A, B. Infectant strains *versus* contaminants. C, D. Clonal  
315 complexes CC18, CC28, CC36, and CC53.

316 **Table 1. Characteristics of cases.**

317 <sup>a</sup>The three cases with both infectant and contaminant *C. acnes* strains were classified as  
318 “infections”.

319 <sup>b</sup>Infection *versus* contamination.

320 **Table 2. Genotypes of strains recovered from the cases.**

321 **Table 3. Recovery of strains and CCs from Lytic Ana and solid media.**

322 <sup>a</sup>Lytic Ana: positivity judged after 14 days of incubation.

323 <sup>b</sup>Solid media: positivity judged after five days of incubation.

324 \*Infectant strains *versus* contaminants,  $p = 0.004$ .

325 \*\*Infectant strains *versus* contaminants,  $p = 0.047$ .

326 **Table 4. TTD values of CCs measured under clinical and experimental conditions.**

327 <sup>a</sup>CC53 *versus* all other CCs.

328 \*TTD values were available for 24 of 31 *C. acnes* strains recovered from blood culture  
329 bottles.

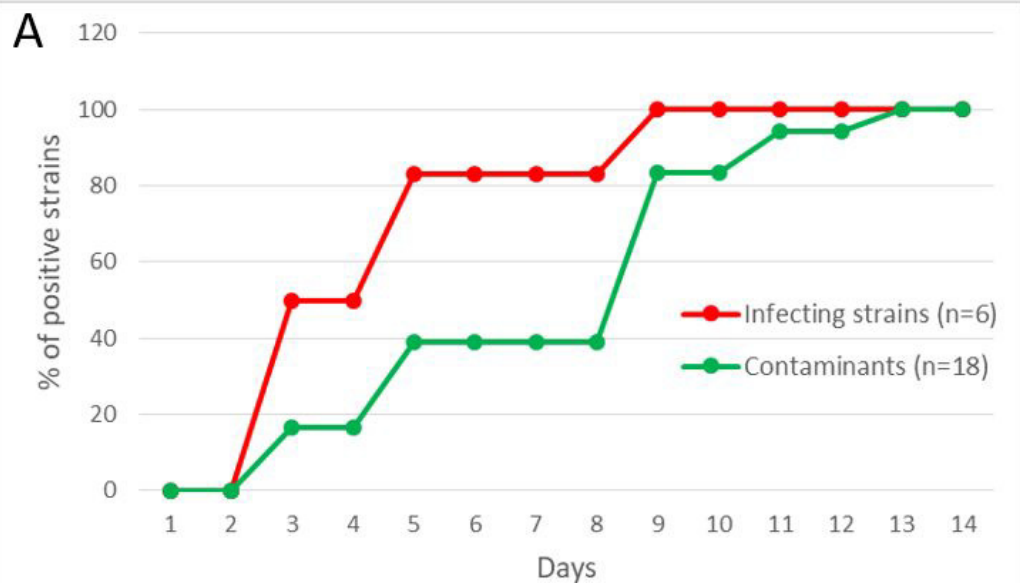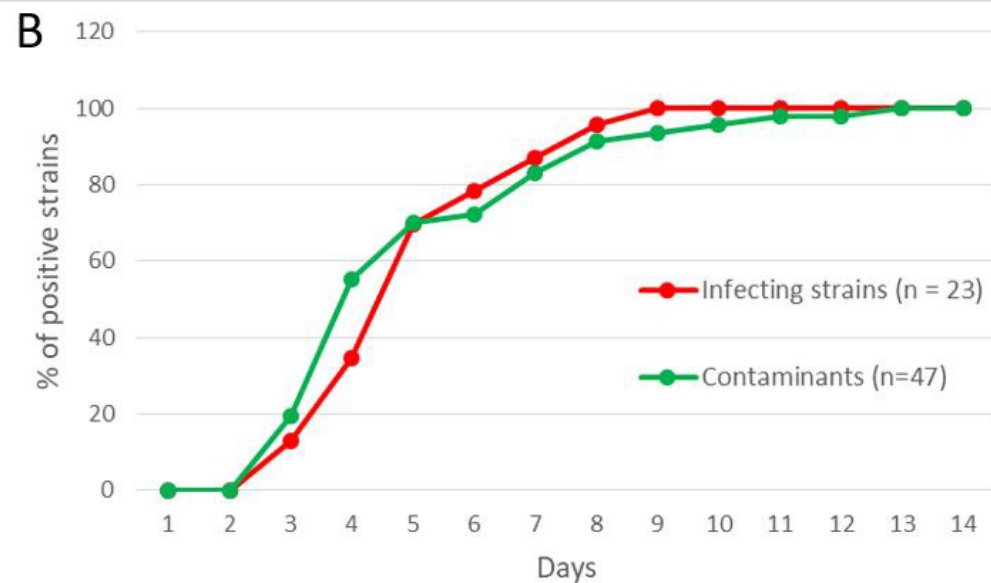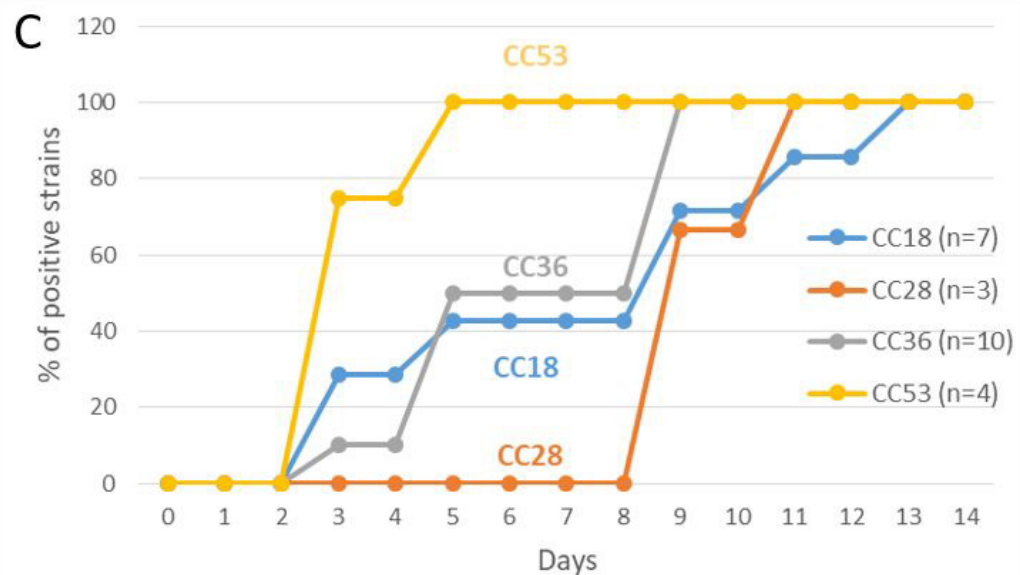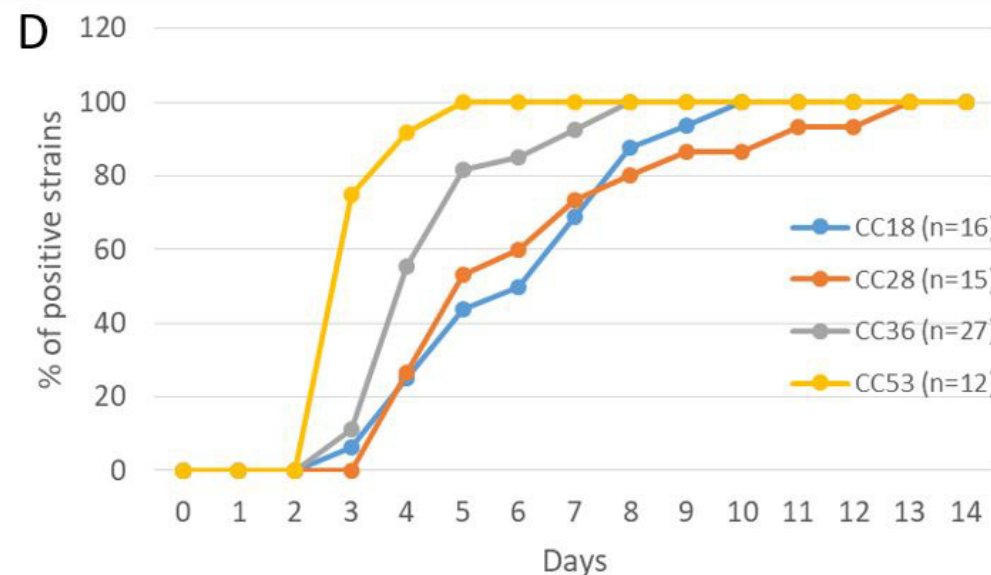

**Table 1. Characteristics of cases.**

| Cases                          | Infection<br>(n=13) <sup>a</sup> | Contamination<br>(n=26) | All cases<br>(n=39) | P-value <sup>b</sup> |
|--------------------------------|----------------------------------|-------------------------|---------------------|----------------------|
| Age, mean (SD)                 | 42 (21.9)                        | 54.8 (17.7)             | 50 (32.5)           | 0.047                |
| Male, n (%)                    | 8 (61.5)                         | 17 (65.4)               | 25 (64.1)           | NS                   |
| Joint prosthesis, n (%)        | 4 (30.8)                         | 18 (69.2)               | 22 (56.4)           | 0.03                 |
| Osteosynthesis material, n (%) | 5 (38.4)                         | 7 (26.9)                | 12 (30.8)           | NS                   |
| Spinal surgery, n (%)          | 4 (30.8)                         | 1 (3.9)                 | 5 (12.8)            | 0.034                |

<sup>a</sup> The three cases with both infectant and contaminant *C. acnes* strains were classified as “infections”.

<sup>b</sup> Infection *versus* contamination.



**Table 2. Genotypes of strains recovered from the cases.**

| Strains             | % (nb) of strains |          |           |           |
|---------------------|-------------------|----------|-----------|-----------|
|                     | CC18              | CC28     | CC36      | CC53      |
| All strains (n=49)  | 22.4 (11)         | 16.3 (8) | 38.8 (19) | 22.4 (11) |
| Infectant (n=13)    | 38.5 (5)          | 15.4 (2) | 23.1 (3)  | 23.1 (3)  |
| Contaminants (n=36) | 16.7 (6)          | 16.7 (6) | 44.4 (16) | 22.2 (8)  |

**Table 3. Recovery of strains and CCs from Lytic Ana and solid media.**

| Strains/CCs              | % (nb) of strains positive in culture                    |                              |                                |
|--------------------------|----------------------------------------------------------|------------------------------|--------------------------------|
|                          | Both Lytic Ana <sup>a</sup> and solid media <sup>b</sup> | Lytic Ana <sup>a</sup> alone | Solid media alone <sup>b</sup> |
| All strains (n=49)       | 22.5 (11)                                                | 40.8 (20)                    | 36.7 (18)                      |
| Infectant strains (n=13) | 53.8 (7)*                                                | 15.4 (2)**                   | 30.8 (4)                       |
| Contaminants (n=36)      | 11.1 (4)*                                                | 50 (18)**                    | 38.9 (14)                      |
| CC18 (n=11)              | 45.4 (5)                                                 | 36.4 (4)                     | 18.2 (2)                       |
| CC28 (n=8)               | 12.5 (1)                                                 | 50 (4)                       | 37.5 (3)                       |
| CC36 (n=19)              | 10.5 (2)                                                 | 42.1 (8)                     | 47.4 (9)                       |
| CC53 (n=11)              | 27.2 (3)                                                 | 36.4 (4)                     | 36.4 (4)                       |

<sup>a</sup> Lytic Ana: positivity judged after 14 days of incubation.

<sup>b</sup> Solid media: positivity judged after 5 days of incubation.

\* Infectant strains *versus* contaminants, p=0.004.

\*\* Infectant strains *versus* contaminants, p=0.047.

**Table 4. TTD values of CCs measured in clinical and experimental conditions.**

|                                      | Clonal complexes |            |            |           | <i>P</i> -value <sup>a</sup> |
|--------------------------------------|------------------|------------|------------|-----------|------------------------------|
|                                      | CC18             | CC28       | CC36       | CC53      |                              |
| <i>Clinical conditions</i>           | n=7              | n=3        | n=10       | n=4       |                              |
| Mean (SD) TTD values*                | 167 [94.5]       | 220 [34.6] | 147 [56.6] | 77.5 [15] | 0.02                         |
| % (nb) of strains positive at 7 days | 43 (3)           | 0 (0)      | 50 (5)     | 100 (4)   |                              |
| <i>Experimental conditions</i>       | n=16             | n=15       | n=27       | n=12      |                              |
| Mean (SD) TTD values                 | 138 [45.8]       | 144 [65.2] | 101 [32.9] | 73 [12.8] | <0.001                       |
| % (nb) of strains positive at 7 days | 69 (11)          | 73 (11)    | 93 (25)    | 100(12)   |                              |

<sup>a</sup> CC53 versus all other CCs.

\*TTD values were available for 24 over 31 *C. acnes* strains recovered in blood culture bottles.
